# Supplementary material
Source: PubMed Central journal article supplement (PMC2646383)
Supplement: NIHMS89745-supplement-supplemental_f.pdf [file NIHMS89745-supplement-supplemental_f.pdf]

## Supplemental Figure Legends

### **Figure S1: Costimulatory blockade with anti-CD40L+anti-B71/2 mAbs markedly diminished complement and cytokine production during T cell APC interactions.**

A) Following interaction of OT-II cells with DCs and ova for 18 hr with 3  $\mu\text{g/ml}$  anti-CD40L mAbs or control IgG, mRNAs in flow separated cells were assayed for C3, C3aR, C5aR and  $\text{IFN}\gamma$  gene expression by qPCR. In parallel cultures,  $\text{IFN}\gamma$  was assessed by ELISPOT. No complement or cytokine upregulation occurred without T cells. Data are normalized to no ova. B) OT-II cells were incubated at 37°C for 18 hr with anti-CD40L+anti-B71/2 mAbs and 0.1  $\mu\text{M}$  ova<sub>323-339</sub> and complement as well as cytokine mRNA assayed by qPCR. The results are normalized to no ova<sub>323-339</sub> with each DC. Identical studies to except that Mar T cells were stimulated with 3 $\mu\text{g/ml}$  anti-CD40L and 0.1  $\mu\text{M}$  Dby peptide.

### **Figure S2: C5aR-A and C3aR-A are specific blockers for their respective GPCRs.**

A) Fura-2 loaded THP-1 cells were alternatively incubated with buffer (left) or C5aR-A (right) following which C5a (left) or C5a and then fMLP (right) was added and  $\text{Ca}^{++}$  flux recorded. A similar experiment was done except the effect of the C3aR-A on fMLP induction of  $\text{Ca}^{++}$  flux was measured. A small agonist effect of the C3aR•A is observed. The C5aR-A inhibited C5a induction but not fMLP induction of a  $\text{Ca}^{++}$  flux even at 100-fold higher concentrations. Testing its specificity showed that it likewise did not inhibit fMLP induction of a  $\text{Ca}^{++}$  flux. Neither the C5aR, the C3aR antagonist, nor the two antagonists together affected upregulation of the activation marker STAT1 or ionomycin

induced  $\text{Ca}^{++}$  flux (data not shown). Titrations with anti-CD3 mAb showed that the antagonists also did not alter the  $\text{Ca}^{++}$  flux which occurs rapidly following TCR stimulation (not shown). B) WT  $\text{CD4}^+$  T cells preincubated with buffer, 10 ng/ml C5aR-A, or 10 ng/ml C3aR-A were incubated with 1  $\mu\text{g}/\text{ml}$  anti-CD3 + 100 ng/ml C5a or anti-CD3 + 100 ng/ml C3a for 10 min and pAKT generation assessed by western blotting.

**Figure S3: .Locally produced C5a and C3a interacting with C5aR and C3aR function in an autocrine and paracrine fashion to upregulate complement**

**production** OT-II T cells were incubated for 1 hr WT or  $C5aR^{-/-}C3aR^{-/-}$  DCs plus  $\text{ova}_{323-339}$ , flow separated, and OT-II cells assayed for C3, C5aR and C3aR mRNA expression and DCs analyzed for C3 mRNA expression.

**Figure S4: The absence of C3a/C5a•C3aR/C5aR signaling blocks T cell generation of C3a and C5a.** WT,  $C3aR^{-/-}C5aR^{-/-}$ , or  $C3^{-/-}C5^{-/-}$  T cells were incubated  $\pm$  3 mg/ml anti-CD3/28 for 18 hr, and concentrated culture supernatants were analyzed by western blotting for C3a or C5a production.

**Figure S5: The absence of C3a/C5a•C3aR/C5aR signaling blocks APC cytokine expression.** OT-II cells plus  $\text{ova}_{323-339}$  and WT or  $C5aR^{-/-}C3aR^{-/-}$  DCs were incubated for 1 hr, and flow separated partners were assayed for cytokine mRNA expression levels by qPCR (left). The DC•OT-II cell mixtures alternatively were cultured for 48 hr and supernatants assayed for IL-12 by ELISA (right).

**Figure S6. C5aR/C3aR ligation activates PI-3K $\gamma$  which in turn promotes AKT phosphorylation.** A) WT T cells were incubated with anti-CD3/CD28 for increasing times  $\pm$  C5aR-A + C3aR-A (10 ng/ml each). Extracts then were western blotted with anti-phospho-Ser<sup>473</sup> AKT mAb (rep of 5 exps). B) WT or *C5aR*<sup>-/-</sup>*C3aR*<sup>-/-</sup> T cells were incubated with anti-CD3/CD28 and extracts western blotted with anti-phospho-Ser<sup>473</sup> AKT mAb (rep of 5 exps).

**A**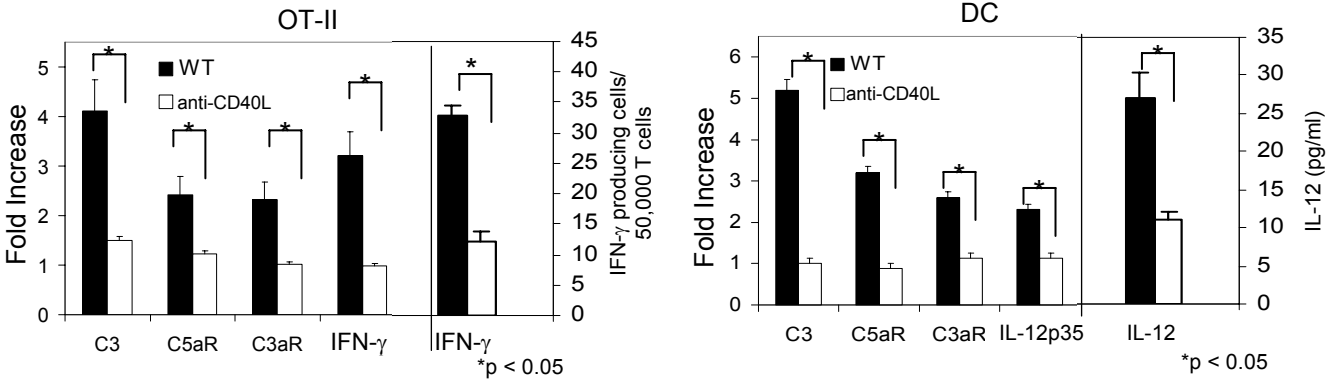**B**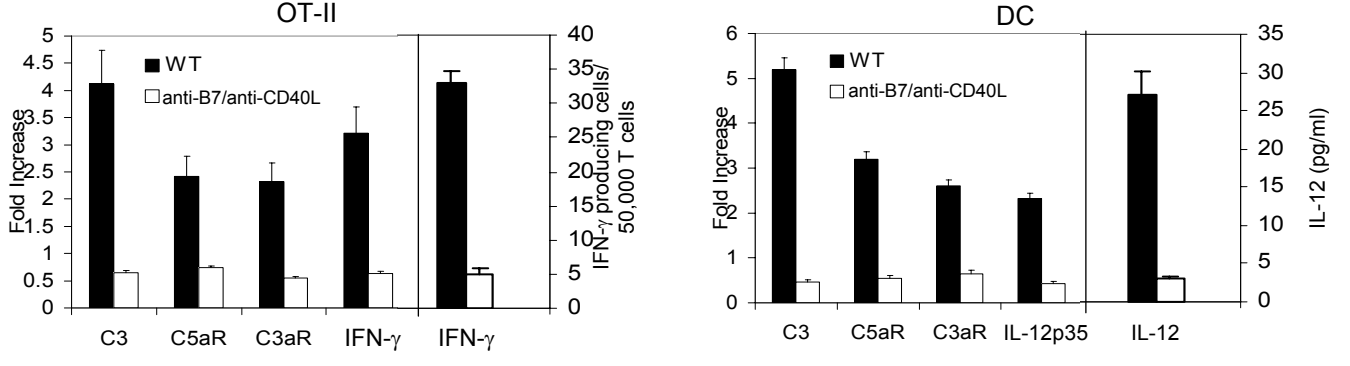**Figure S1**

A

C5aR-A vs C5a

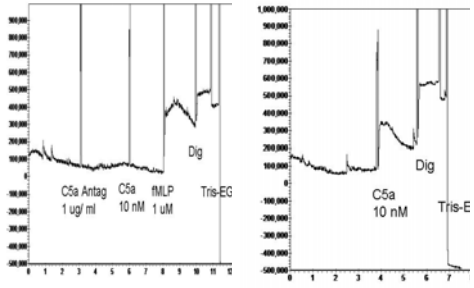

C3aR-A vs C3a

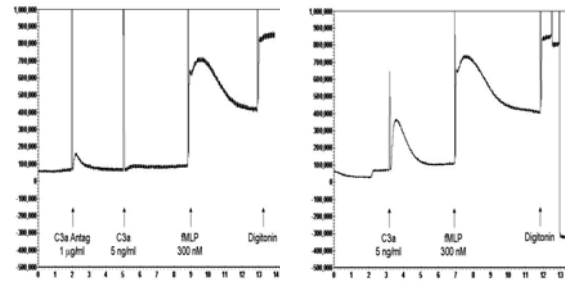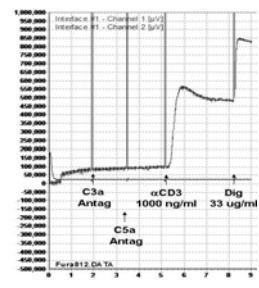

Time (min)

B

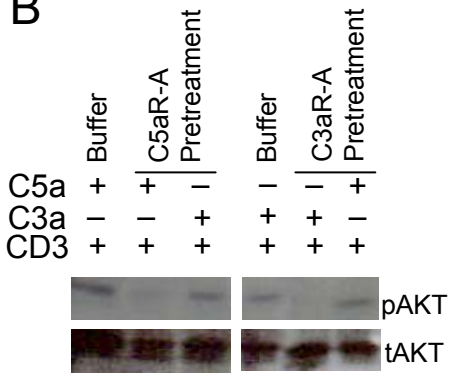

Figure S2

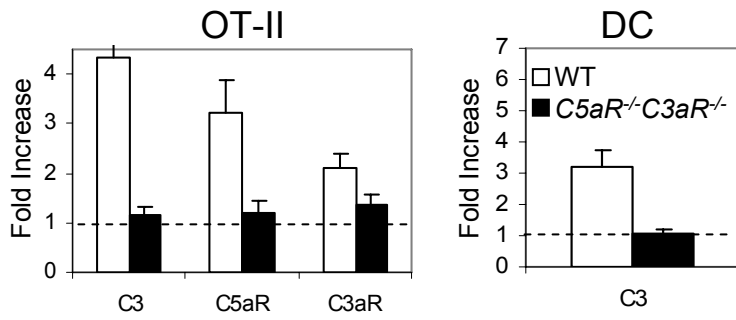

Figure S3

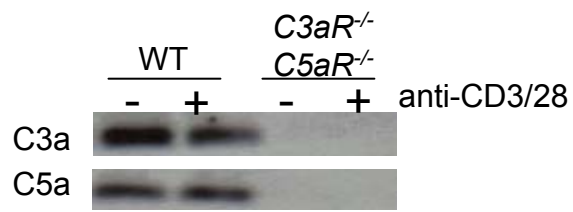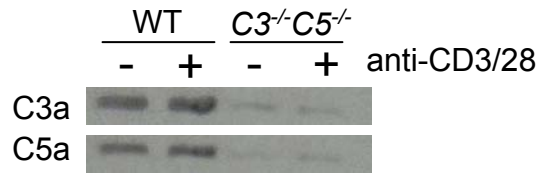

Figure S4

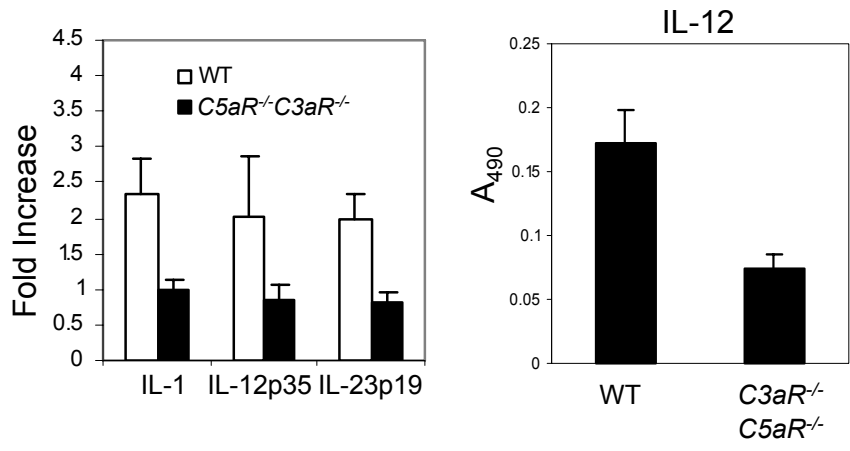

Figure S5



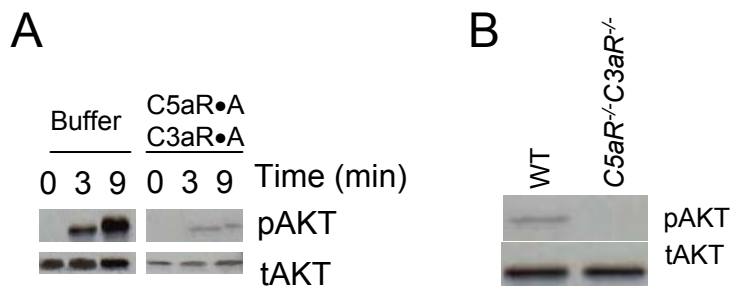

Figure S6
